# Supplementary material for: Controllable Production of Natural Silk Nanofibrils for Reinforcing Silk-Based Orthopedic Screws
Source: MDPI journal article supplement (doi:10.3390/polym15071645), 2023-03-25
Supplement: s1 [file s1]

## Supporting Information

# Controllable Production of Natural Silk Nanofibrils for Reinforcing Silk-Based Orthopedic Screws

Shuqin Yan <sup>1,†</sup>, Li He <sup>1,†</sup>, Abdul Moqees Hai <sup>2</sup>, Zhanao Hu <sup>1</sup>, Renchuan You <sup>1</sup>, Qiang Zhang <sup>1,\*</sup> and David L. Kaplan <sup>3</sup>

<sup>1</sup> State Key Laboratory of New Textile Materials and Advanced Processing Technologies, School of Textile Science and Engineering, Wuhan Textile University, Wuhan 430200, China

<sup>2</sup> Institute of Polymer and Textile Engineering, Quaid-e-Azam Campus, University of the Punjab, Lahore 54590, Pakistan

<sup>3</sup> Department of Biomedical Engineering, Tufts University, Medford, MA 02155, USA

\* Correspondence: author: zhangq12041008@163.com

† These authors contributed equally to this work.

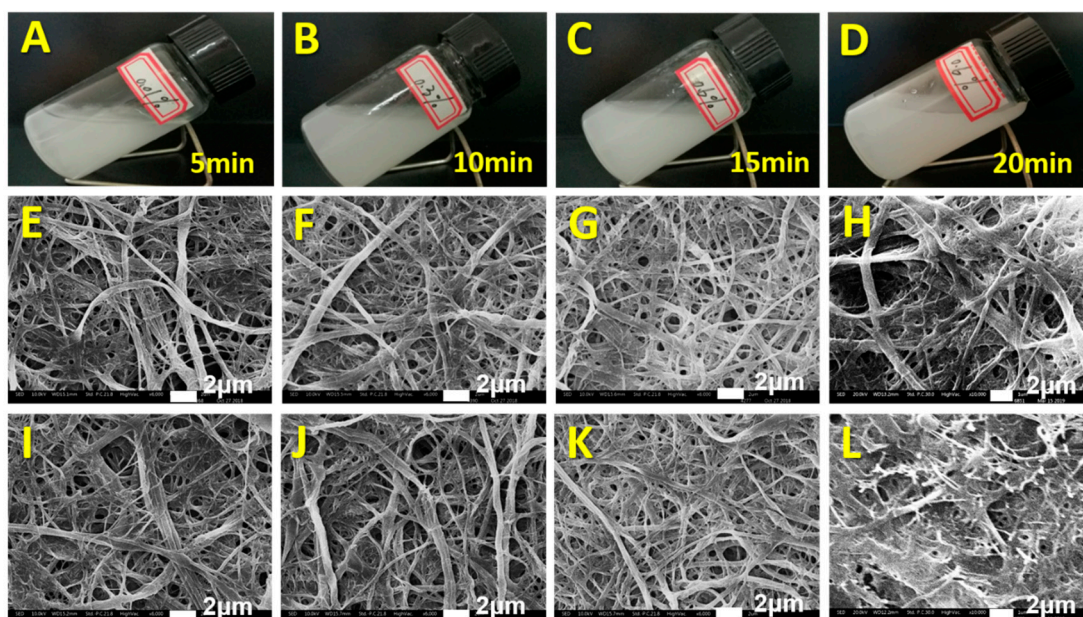

**Figure S1** The SEM images of silk micro-nanofibers and SNF films. (A–D)

represents the gross appearance of the SNFs obtained by different treatment times, E–H) Silk fibers treated for different times at 30 °C. I–L) Silk fibers treated for different times at 35 °C, scale bar = 2μm.
